# Supplementary material for: Bridging to Surgery Versus Palliation in Malignant Colorectal Obstruction: Complication Risks and Mediation by Clinical Success
Source: Research Square preprint supplement (doi:10.21203/rs.3.rs-7750665/v1), 2025-11-03
Supplement: Supplementary file 1 [file 1601c3bc0ca99c0b8105cedd.docx]

***Supplementary Materials***

**Table S1.** Results of Sobel mediation test.

|  | **Sobel** | **Aroian** | **Goodman** |
| --- | --- | --- | --- |
| ***z* value** | -2.112 | -2.060 | -2.170 |
| ***p* value** | 0.035 | 0.039 | 0.030 |


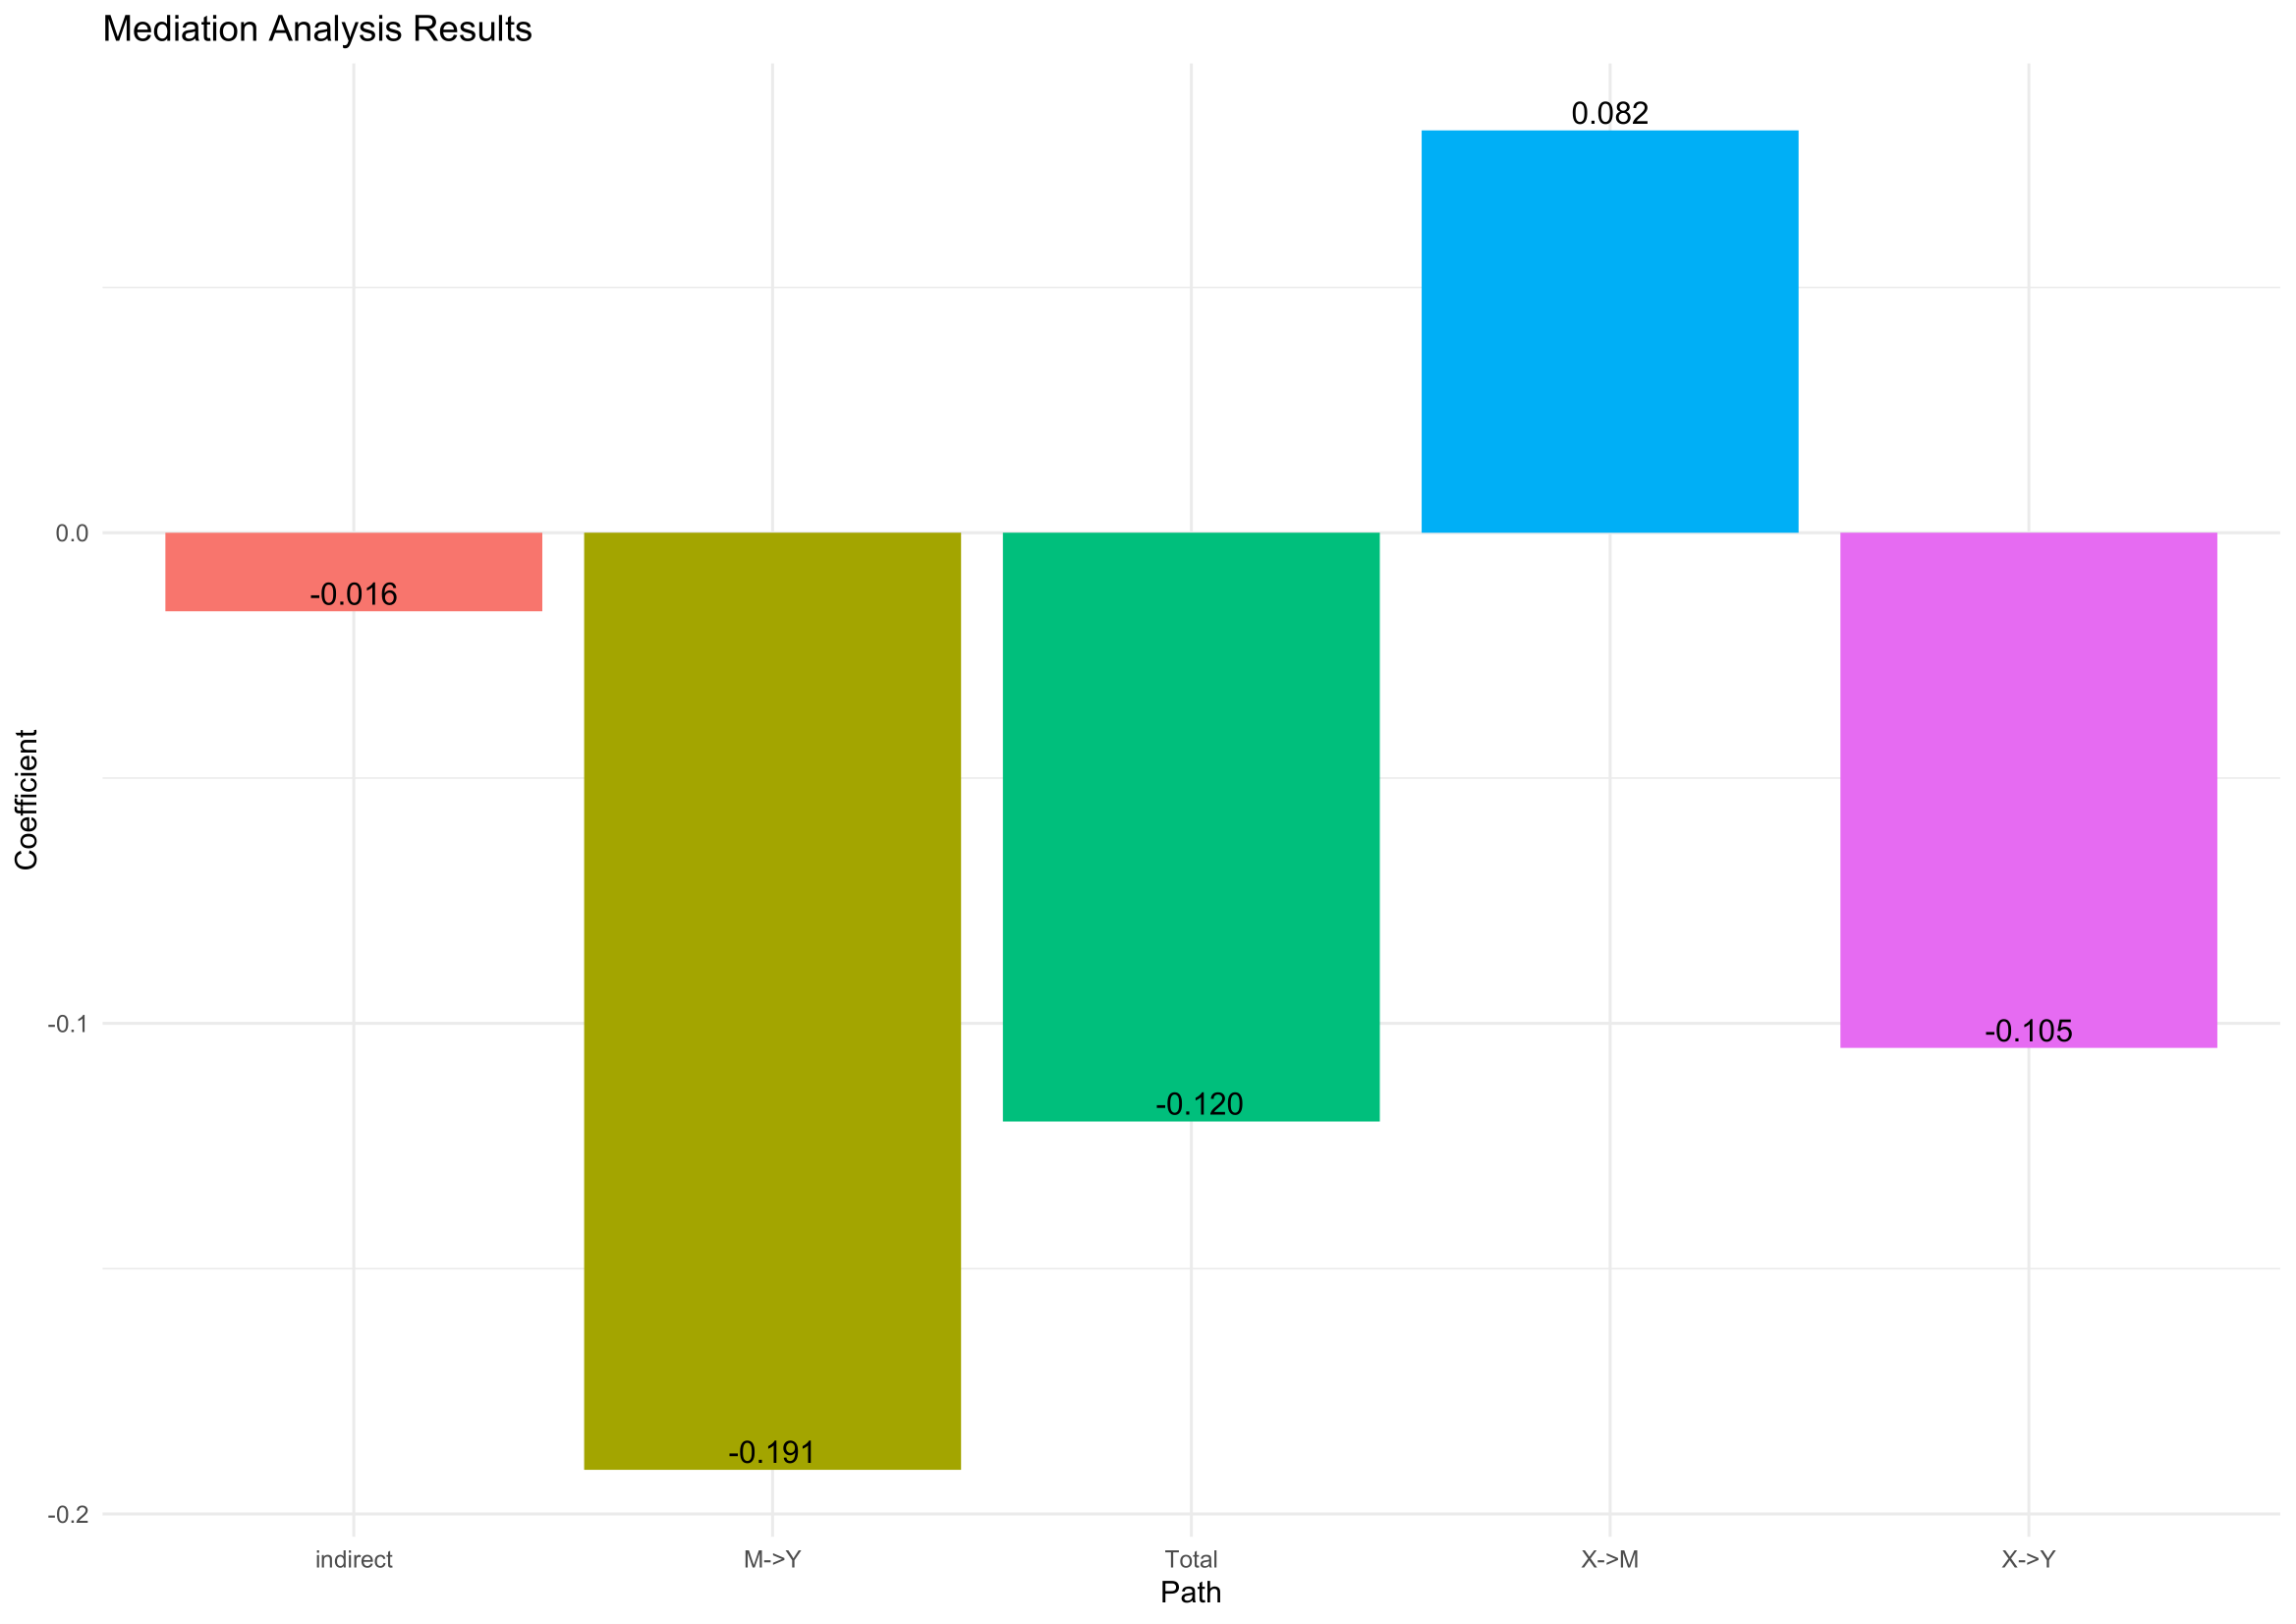


**Figure S1.** Bar chart displaying the coefficients for each path in the mediation model.
